# Supplementary material
Source: PubMed Central journal article supplement (PMC7206151)
Supplement: 42003_2020_910_MOESM1_ESM.pdf [file 42003_2020_910_MOESM1_ESM.pdf]

## Supplementary Figures

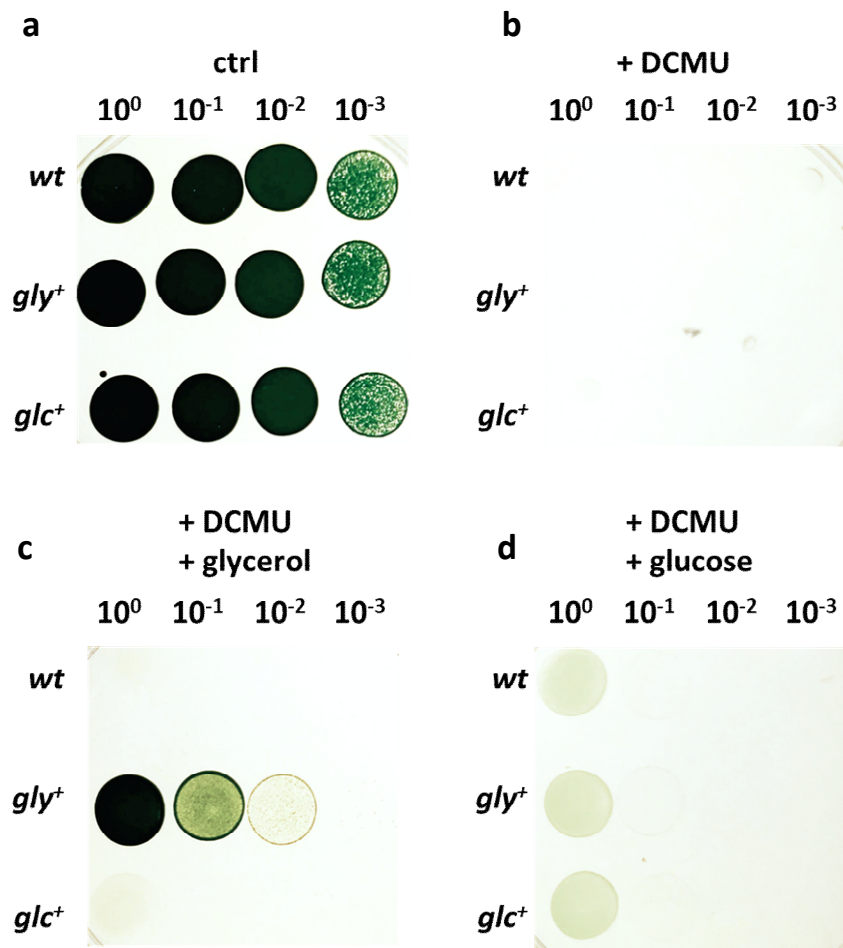

**Supplementary Figure 1.** Glycerol and glucose tolerance of PCC 11901 and photoheterotrophy analysis. Wild-type (*wt*), glycerol (*gly*<sup>+</sup>) and glucose (*glc*<sup>+</sup>) adapted strains were grown to OD<sub>730</sub> = 5 and subsequently diluted. Dilutions were transferred onto solid AD7 medium without any additives (a), with 10 μM of herbicide DCMU (b), 10 μM DCMU and 10 mM glycerol (c) and finally 10 μM DCMU and 0.15 % glucose (d).

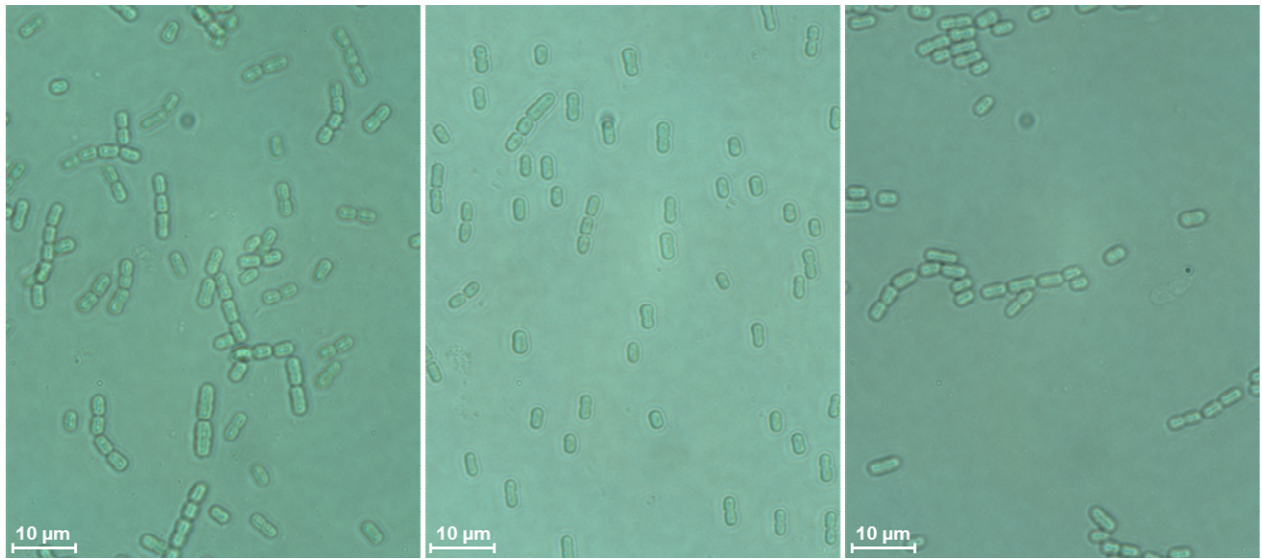

**Supplementary Figure 2.** Bright-field microscopy images of the PCC 11901 strain (magnification 1000x). Samples were collected at  $OD_{730} \approx 5$

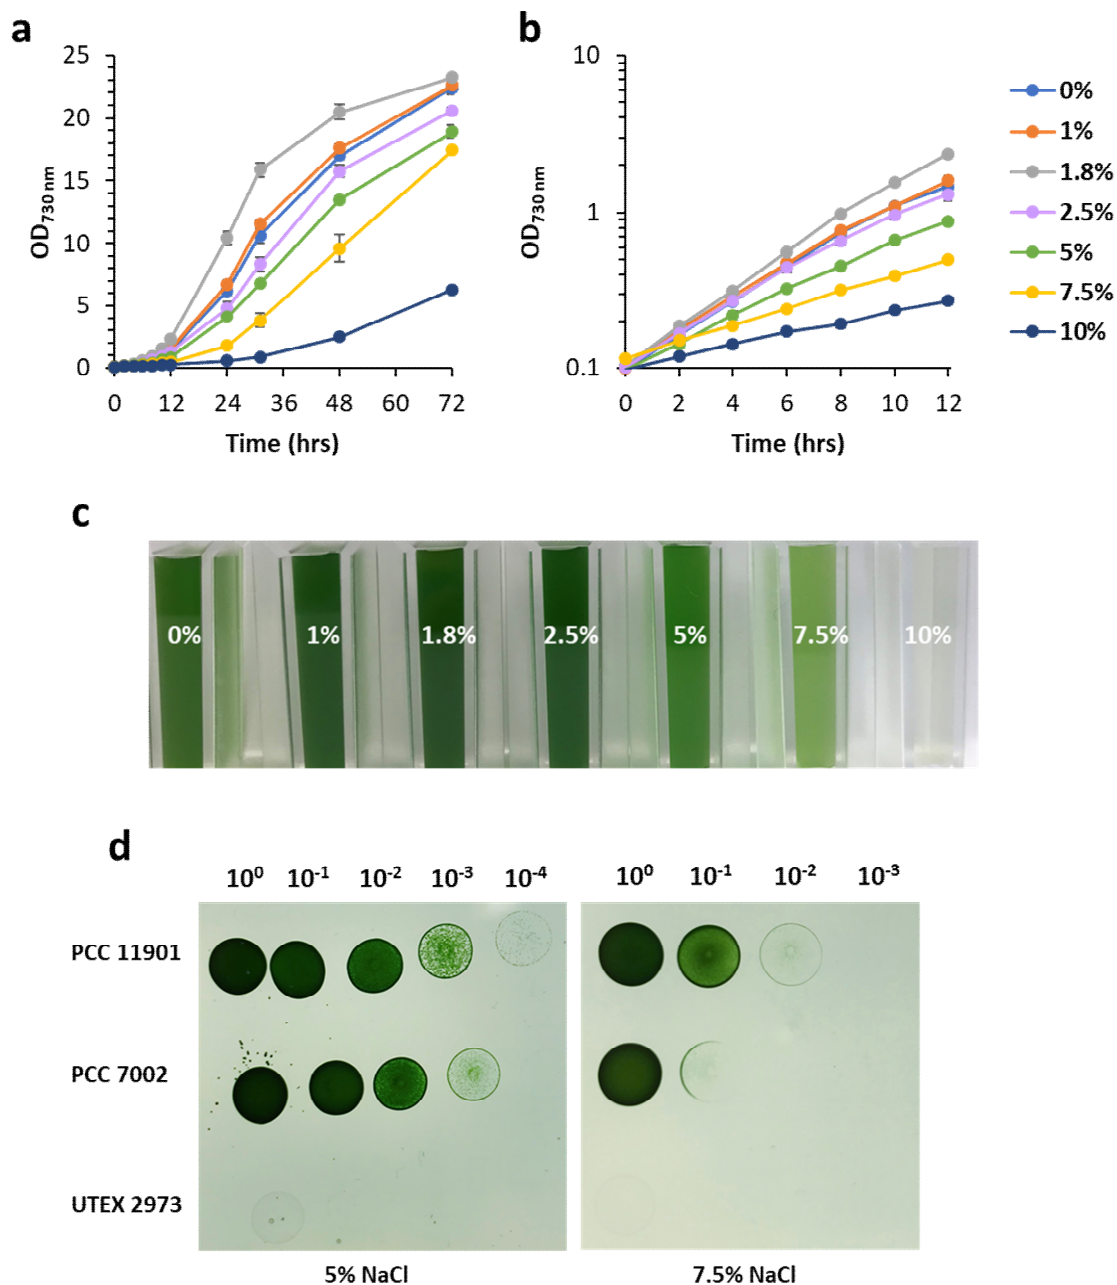

**Supplementary Figure 3.** Salt tolerance analysis of PCC 11901 strain. **(a)** Cultures were grown in triplicates for 72 hours at 38 °C, 1% CO<sub>2</sub>, 225 rpm shaking, constant illumination of 300 μmol photons·m<sup>-2</sup>·s<sup>-1</sup> using AD7 media with varying sodium chloride (w/v) concentrations. **(b)** In the exponential growth phase, measurements were taken in 2-hours intervals. Time points within exponential phase were used for calculating the average growth rate. Average OD<sub>730</sub> was calculated as mean of n=3 biological replicates ± standard deviation. **(c)** Culture samples displayed collected after 24 hours of cultivation. **(d)** Salt tolerance of PCC 11901, PCC 7002 and UTEX 2973 strains. Cultures grown in regular media were grown to OD=5, subsequently diluted and plated on solid AD7 medium with 5% and 7.5% sodium chloride. Plates were incubated at 100 μmol photons·m<sup>-2</sup>·s<sup>-1</sup> and 38 °C for 7 days.

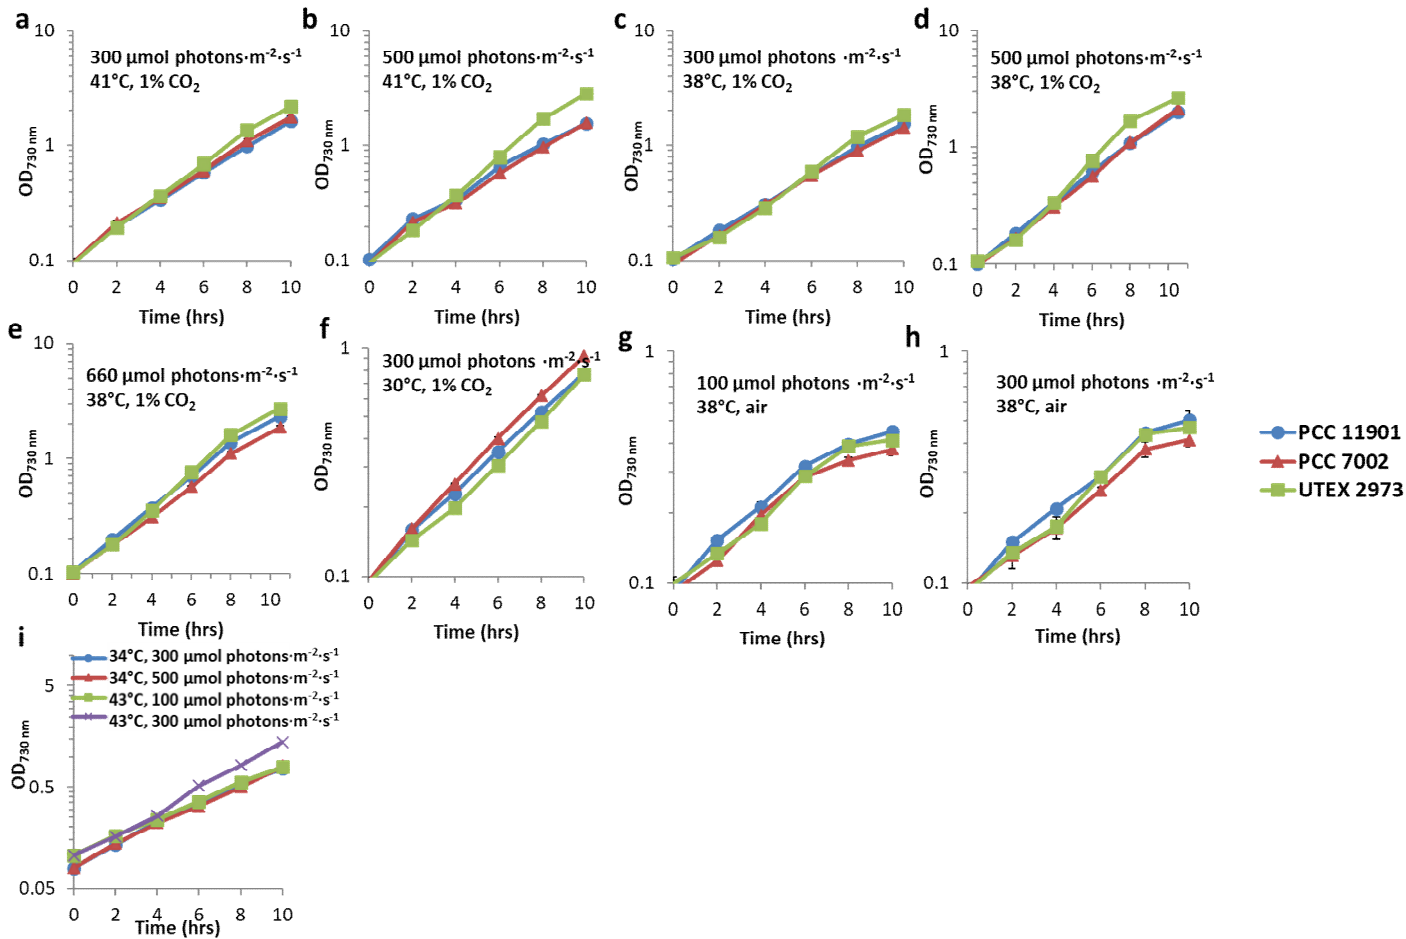

**Supplementary Figure 4.** Growth performance comparison of PCC 11901, PCC 7002 and UTEX 2973 strains in different conditions. Strains, depending on requirements were grown in either AD7 or BG-11 medium, under constant illumination using LED RGB light 4:2:1 ratio setting (**a-d, f-h**), except for growth curve (**e**) where red and blue LEDs only were used at 1:1 ratio. All strains were inoculated to initial OD<sub>730</sub> of approximately 0.1. Cultures were grown in triplicates and OD<sub>730</sub> measurements were taken in 2-hours intervals. Time-points within exponential growth phase only were used for calculating average doubling time. In blue growth curves of PCC 11901, in red PCC 7002 and in green UTEX 2973. Average OD<sub>730</sub> was calculated as mean of n=3 biological replicates  $\pm$  standard deviation. (**i**) Growth performance of PCC 11901 strain in additional light and temperature conditions.



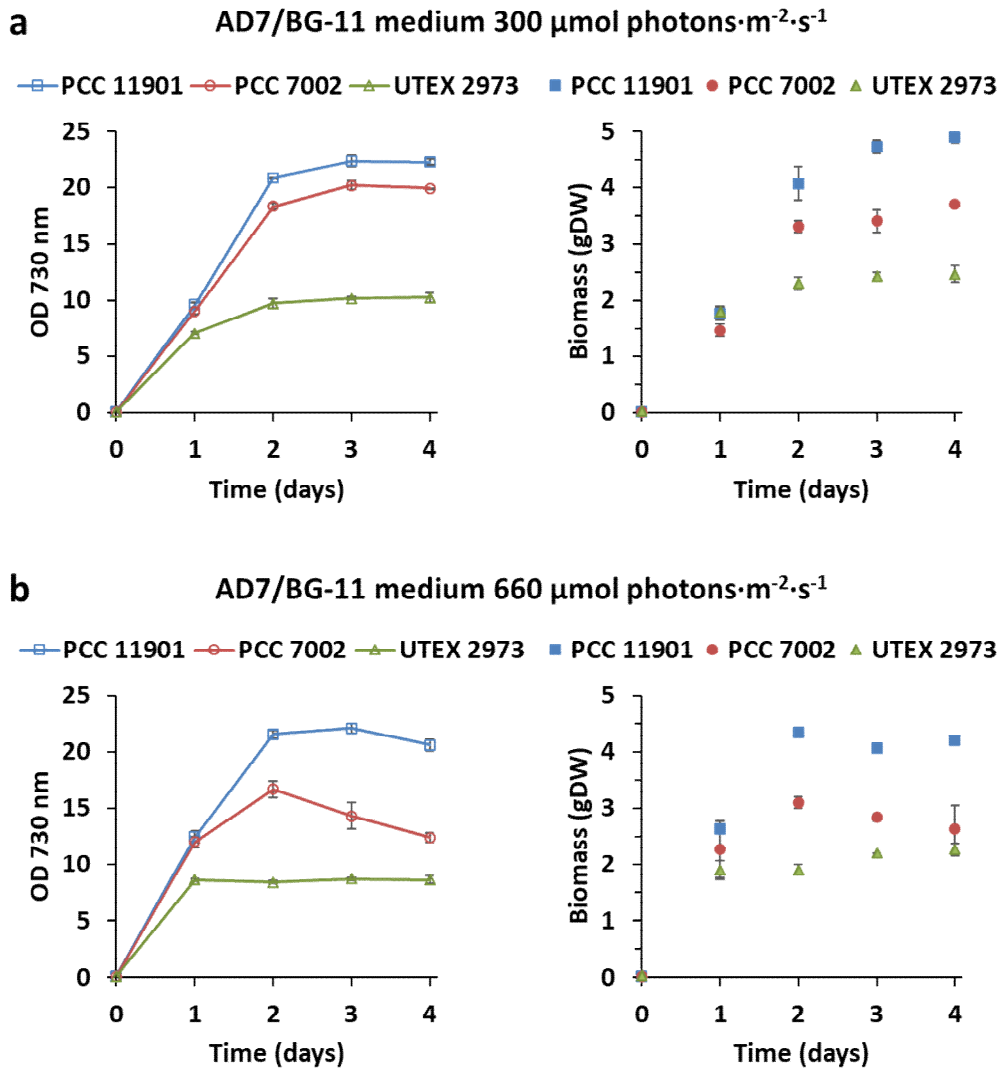

**Supplementary Figure 5.** Growth performance and biomass accumulation of PCC 11901, PCC 7002 and UTEX 2973 using basic AD7 or BG-11 medium. Lines with empty markers correspond to OD<sub>730</sub> measurements, whereas filled markers correspond to biomass accumulation. Strains were grown at 38 °C, 225, 1% CO<sub>2</sub> rpm at either **(a)** 300  $\mu\text{mol photons}\cdot\text{m}^{-2}\cdot\text{s}^{-1}$  RGB 4:2:1 or **(b)** 660  $\mu\text{mol photons}\cdot\text{m}^{-2}\cdot\text{s}^{-1}$  RB 1:1. Average OD<sub>730</sub> and biomass were calculated as mean of n=3 biological replicates  $\pm$  standard deviation.

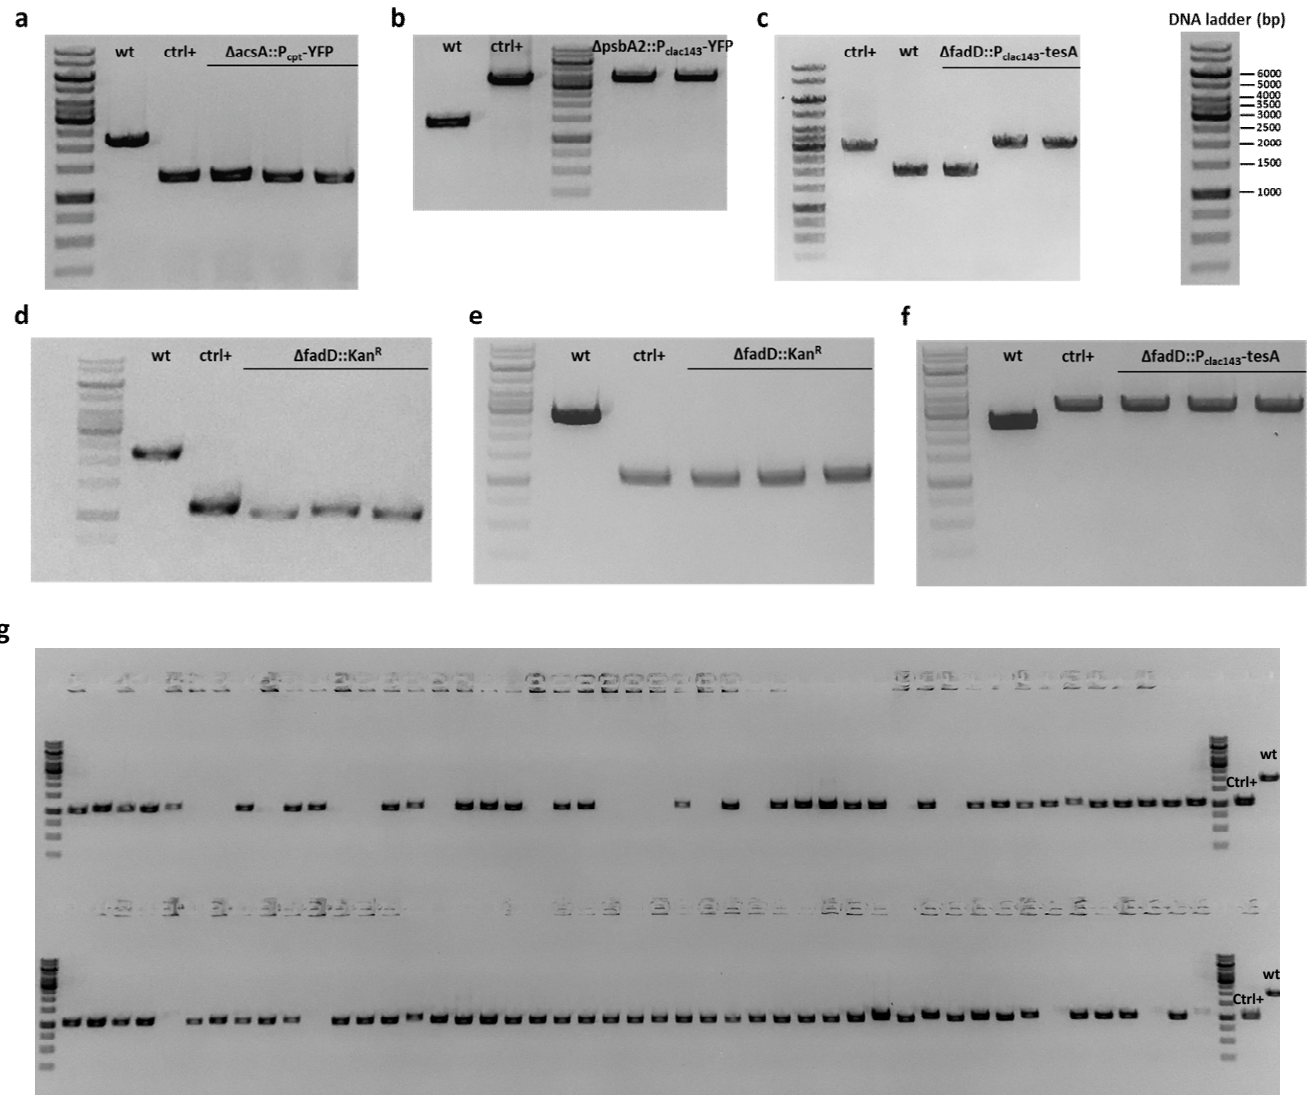

**Supplementary Figure 6.** Genotyping PCRs of engineered PCC 11901 and PCC 7002 strains. Primers used for the reactions are listed in **Table S4**. Genotyping of **(a)**  $\Delta$ acsA::P<sub>cpt</sub>-YFP, **(b)**  $\Delta$ psbA2::P<sub>clac143</sub>-YFP, **(c)** 11901  $\Delta$ fadD::P<sub>clac143</sub>-tesA, **(d)** 11901  $\Delta$ fadD::Kan<sup>R</sup>, **(e)** 7002  $\Delta$ fadD::Kan<sup>R</sup> and **(f)** 7002  $\Delta$ fadD::P<sub>clac143</sub>-tesA transformants. **(g)** Genotyping of 94 colonies of 11901  $\Delta$ fadD::Kan<sup>R</sup> for the transformation efficiency assessment. DNA ladder: GeneRuler 1kb (#SM0311, NEB).

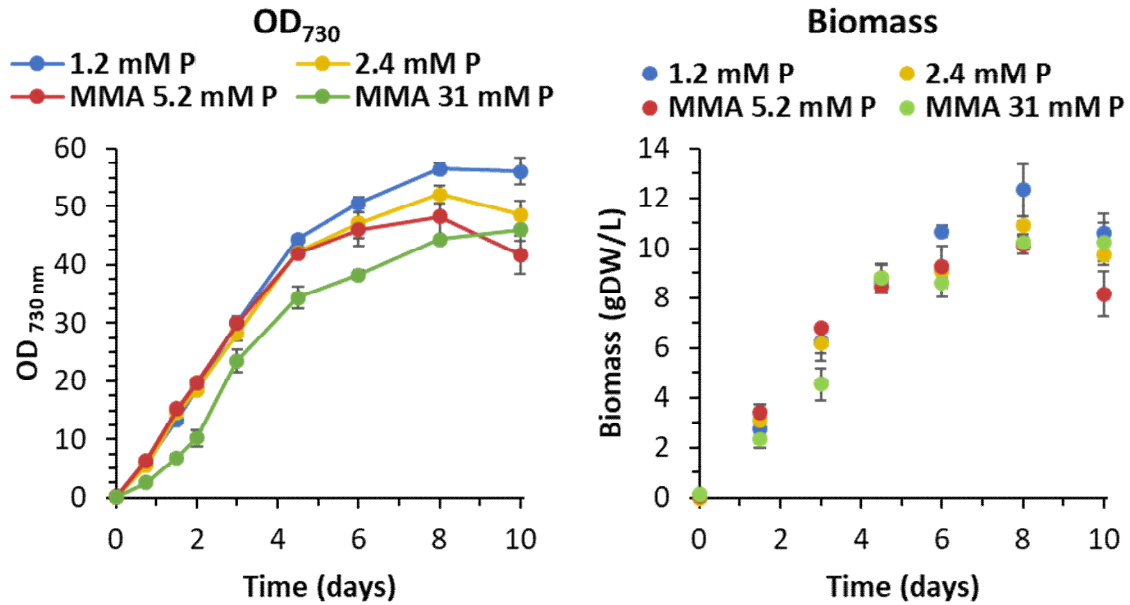

**Supplementary Figure 7.** Comparison of PCC 11901 strain's growth in different modified media. Two enriched medium formulation variants used in this study were compared with previously published MMA medium optimized for PCC 7002<sup>1</sup>. All cultures were grown in triplicates at 38 °C, 1% CO<sub>2</sub>, 200 rpm, 300 μmol photons·m<sup>-2</sup>·s<sup>-1</sup>. OD<sub>730</sub> and dry cell weight were measured in time intervals for 10 days. In blue AD medium supplemented with 96 mM NaNO<sub>3</sub>, 1.2 mM KH<sub>2</sub>PO<sub>4</sub> (P) and 240 μM FeCl<sub>3</sub> (MAD), in yellow is the same medium but with more phosphate added (2.4 mM KH<sub>2</sub>PO<sub>4</sub>). Red and green markers correspond to MMA medium (120 mM NaNO<sub>3</sub>, 1.1 mM FeCl<sub>3</sub>) with either 5.2 or 31 mM KH<sub>2</sub>PO<sub>4</sub> respectively. Average OD<sub>730</sub> and biomass were calculated as mean of n=3 biological replicates ± standard deviation.

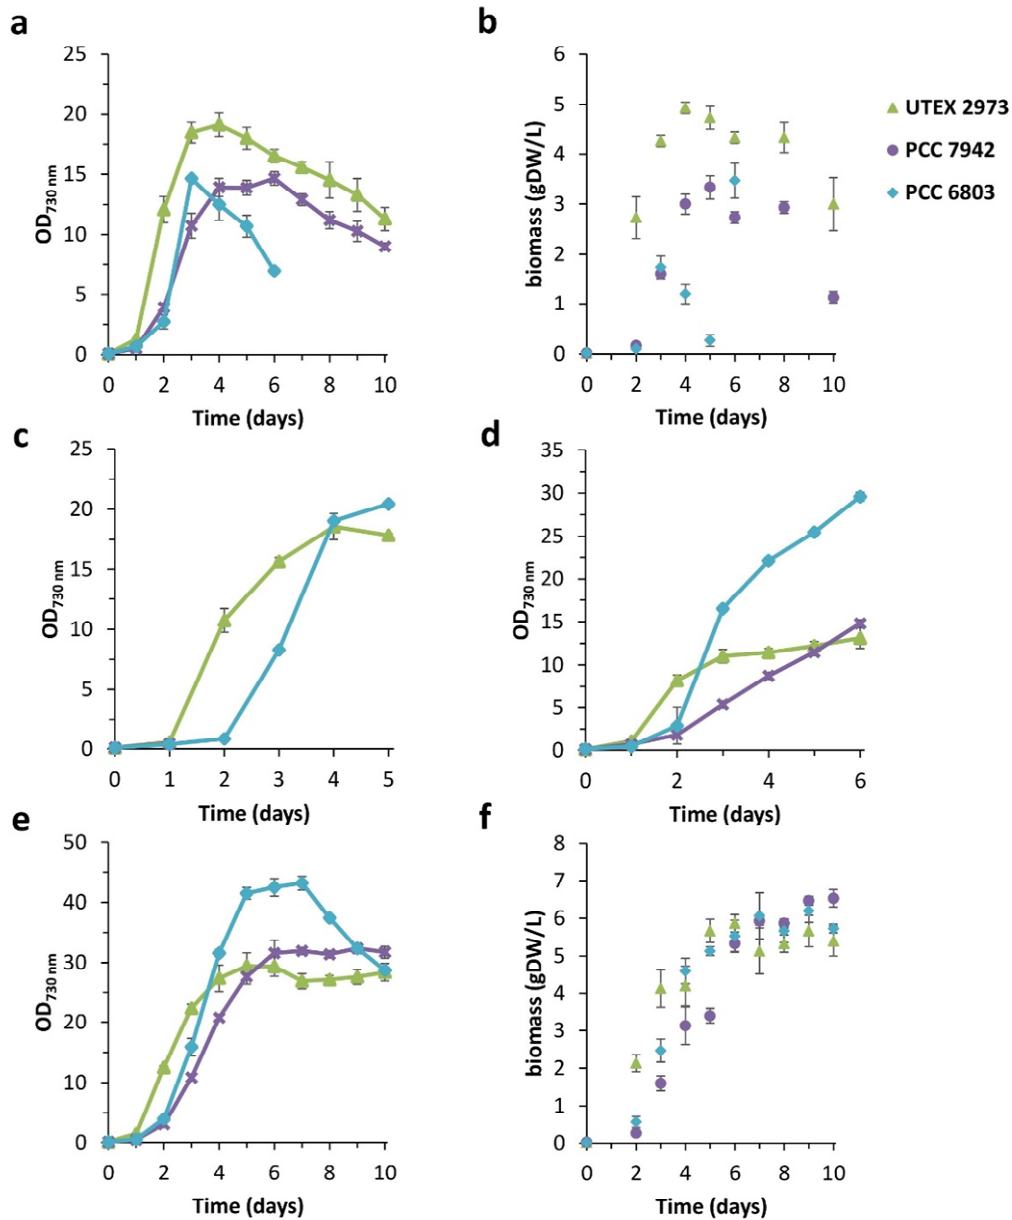

**Supplementary Figure 8.** Growth and biomass accumulation comparison of UTEX 2973, PCC 7942 and PCC 6803 cultured in different optimized media. All strains were grown at 30 °C, 1% CO<sub>2</sub> and 200 rpm shaking. In the first 24 hours of growth UTEX 2973 was incubated at 150 μmol photons·m<sup>-2</sup>·s<sup>-1</sup> light intensity, which was then increased to 750 μmol photons·m<sup>-2</sup>·s<sup>-1</sup>. For PCC 7942 and PCC 6803 initial light intensity was set to 75 μmol photons·m<sup>-2</sup>·s<sup>-1</sup>, changed to 150 μmol photons·m<sup>-2</sup>·s<sup>-1</sup> after 1 day and then increased to 750 μmol photons·m<sup>-2</sup>·s<sup>-1</sup> on day 2. RGB ratio of LED lights was set to 1:1:1 throughout whole experiment. **(a,b)** Growth and dry cell weight for all freshwater strains grown in MBG medium (BG-11 with 96 mM NaNO<sub>3</sub> and 1.2 mM KH<sub>2</sub>PO<sub>4</sub> and 240 μM ammonium iron (III) citrate) **(c)** MBG supplemented with 20 mM MgSO<sub>4</sub>, **(d)** MAD medium with 0% NaCl and **(e,f)** 5xBGM (5xBG medium with 96 mM NaNO<sub>3</sub>, 0.6 mM KH<sub>2</sub>PO<sub>4</sub> and 0.6 mM K<sub>2</sub>HPO<sub>4</sub>). All above media recipes are listed in **Table S3**. Average OD<sub>730</sub> and biomass were calculated as mean of n=3 biological replicates ± standard deviation.

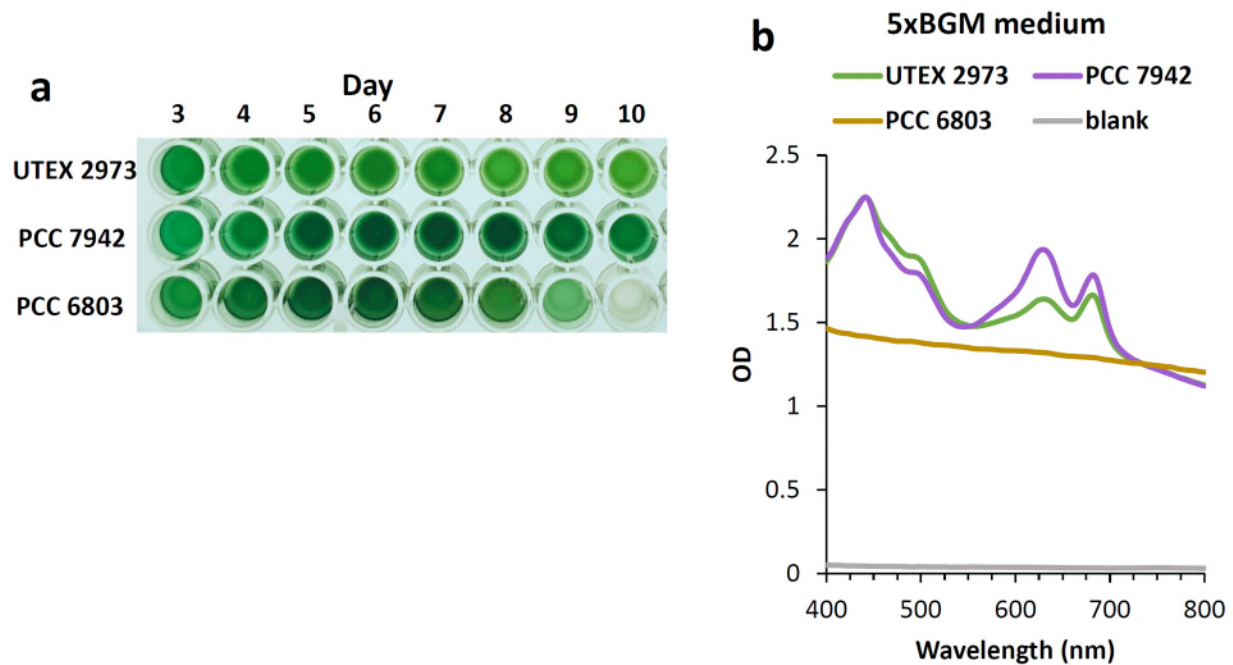

**Supplementary Figure 9.** Pigmentation of UTEX 2973, PCC 7942 and PCC 6803 cultures in 5xBGM medium. **(a)** Appearance of all strains grown at 30 °C, 200 rpm, 1% CO<sub>2</sub> for 10 days. **(b)** Whole cell spectra of cultures collected after 10 days of continuous growth.

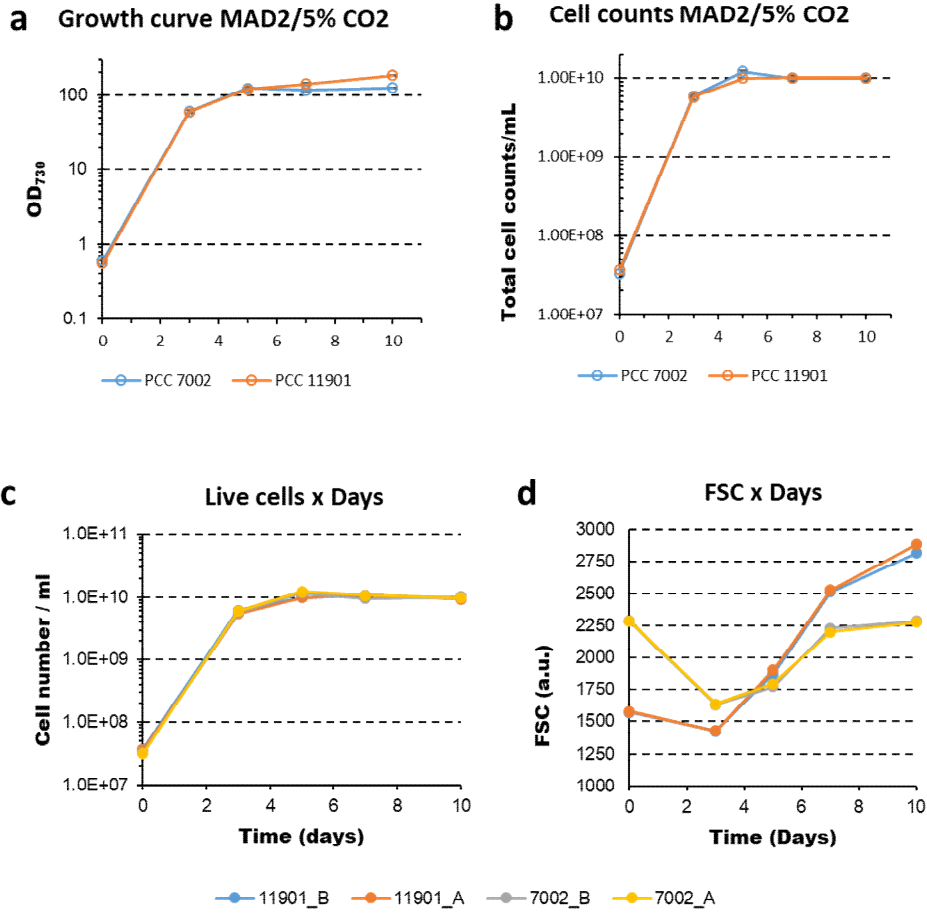

**Supplementary Figure 10.** Graphical representation of OD<sub>730</sub> (a), total cell counts/mL (b), live cell counts/mL (c) and forward scatter (FSC) (d) variation over time for PCC 7002 and PCC 11901 cultures. Data shown is for two independent cultures per strain. Variation at day 10 is statistically significant for a ( $p=0.00059$ ) and d ( $p=0.0037$ ).



## PCC 7002

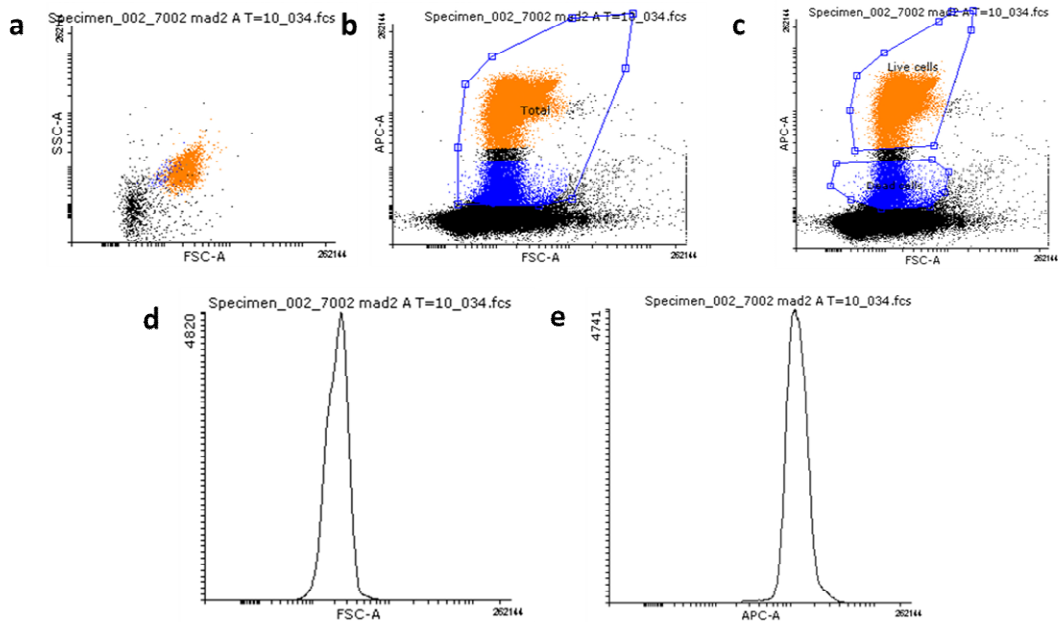

## PCC 11901

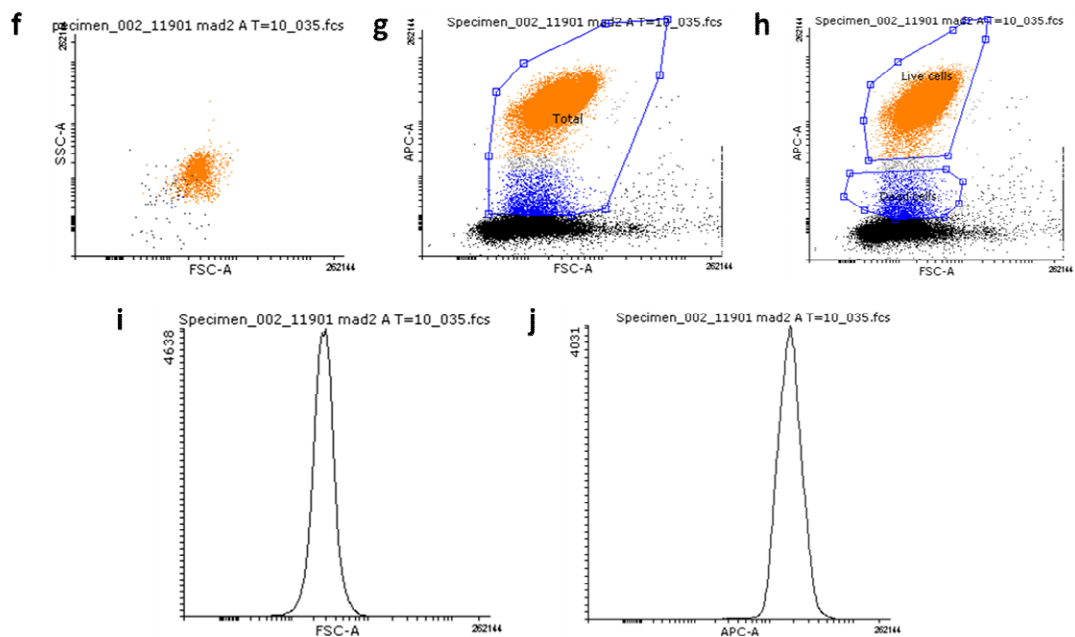

**Supplementary Figure 11. Gating strategy used for flow cytometry-based cell count and cell size estimation experiments.** Data shown is for the 10 days data point. (a, f) Side scatter (SSC) vs forward scatter (FSC). Gates drawn on dot plots for same populations as in a and f, using allophycocyanin (APC-A) vs FSC for whole population (b, g) or live vs dead cell populations (c, h). (d, i) Histogram of FSC based on whole cell population dot plots. (e, j) Histogram of APC-A based on whole cell population.

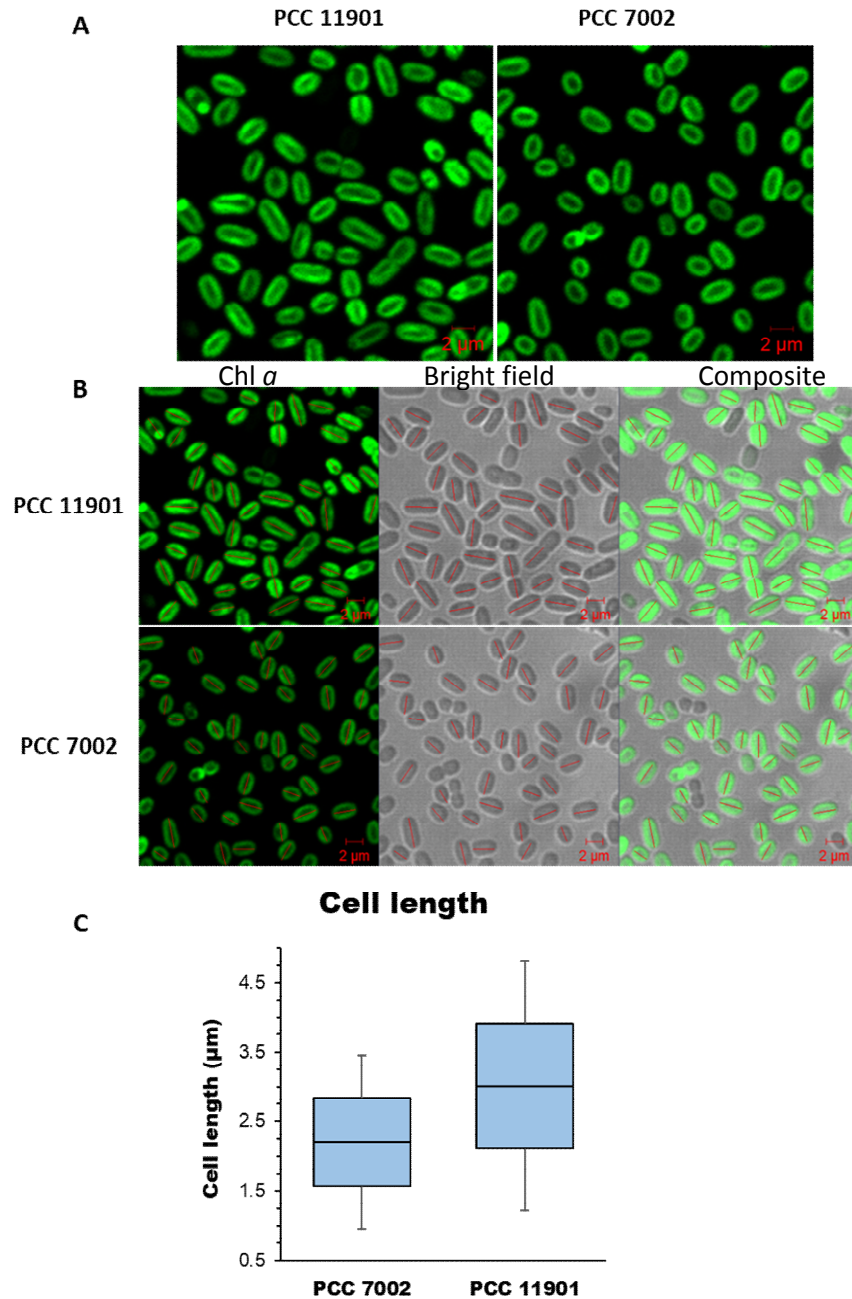

**Supplementary Figure 12.** (a) Confocal fluorescence microscopy images of PCC 7002 and PCC 11901 at day 10. (b) Micrographs with overlays for cell length determination. (c) Box and whisker plots for PCC 7002 and PCC 11901 cell length distribution. Data shown is for  $n=102$  cells, at 10 days post-inoculation in MAD2 medium, 5%  $\text{CO}_2$  and  $700 \mu\text{mol photons}\cdot\text{m}^{-2}\cdot\text{s}^{-1}$ . Variation is statistically significant (ANOVA,  $p=5\cdot 10^{-23}$ ,  $\eta^2=0.621$ ).

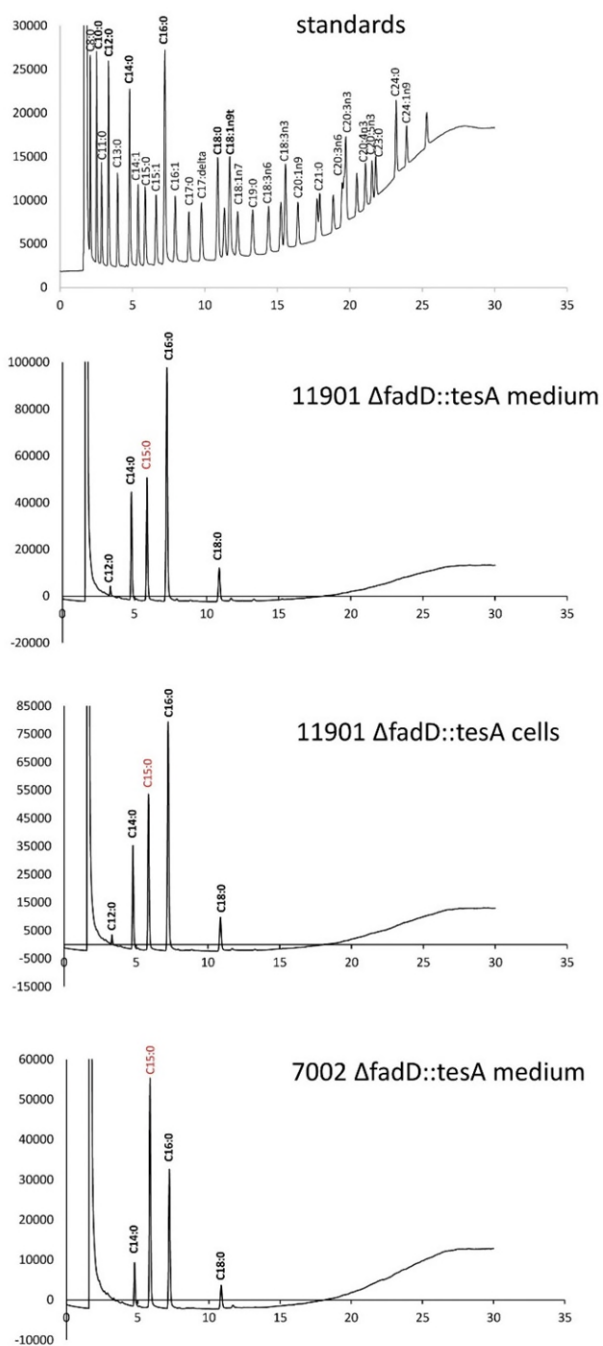

**Supplementary Figure 13.** GC chromatograms of medium and cell extracts samples of engineered FFA producing strains. Samples were spiked with internal C15:0 standard.

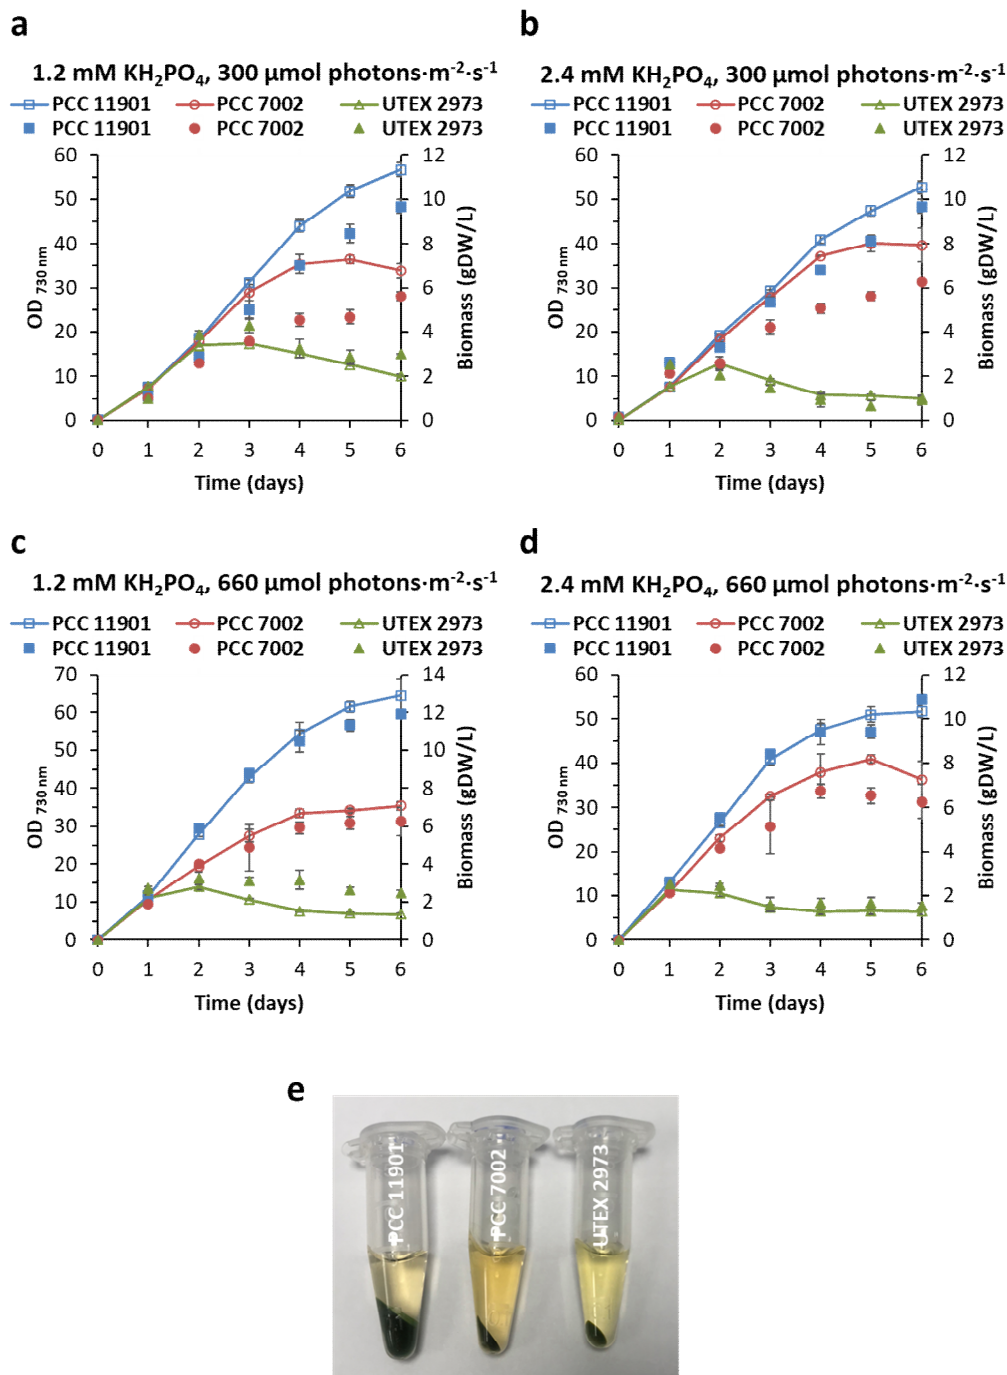

**Supplementary Figure 14.** Growth performance and biomass accumulation of PCC 11901, PCC 7002 and UTEX 2973 using optimized MAD and MBG media. Lines with empty markers correspond to OD<sub>730</sub> measurements, whereas filled markers correspond to biomass accumulation. Strains were grown at 38 °C, 1% CO<sub>2</sub>, 200 rpm at constant illumination of either 300  $\mu\text{mol photons}\cdot\text{m}^{-2}\cdot\text{s}^{-1}$  RGB 4:2:1 (**a, b**) or 660  $\mu\text{mol photons}\cdot\text{m}^{-2}\cdot\text{s}^{-1}$  RB 1:1 (**c, d**). MAD and MBG media used for cultivation of strains contained either 1.2 mM (**a,c**) or 2.4 mM (**b, d**) of  $\text{KH}_2\text{PO}_4$ . Average OD<sub>730</sub> and biomass were calculated as mean of n=3 biological replicates  $\pm$  standard deviation. (**e**) Display of cell pellets centrifuged using 0.5 mL of cultures after 6 days of cultivation.

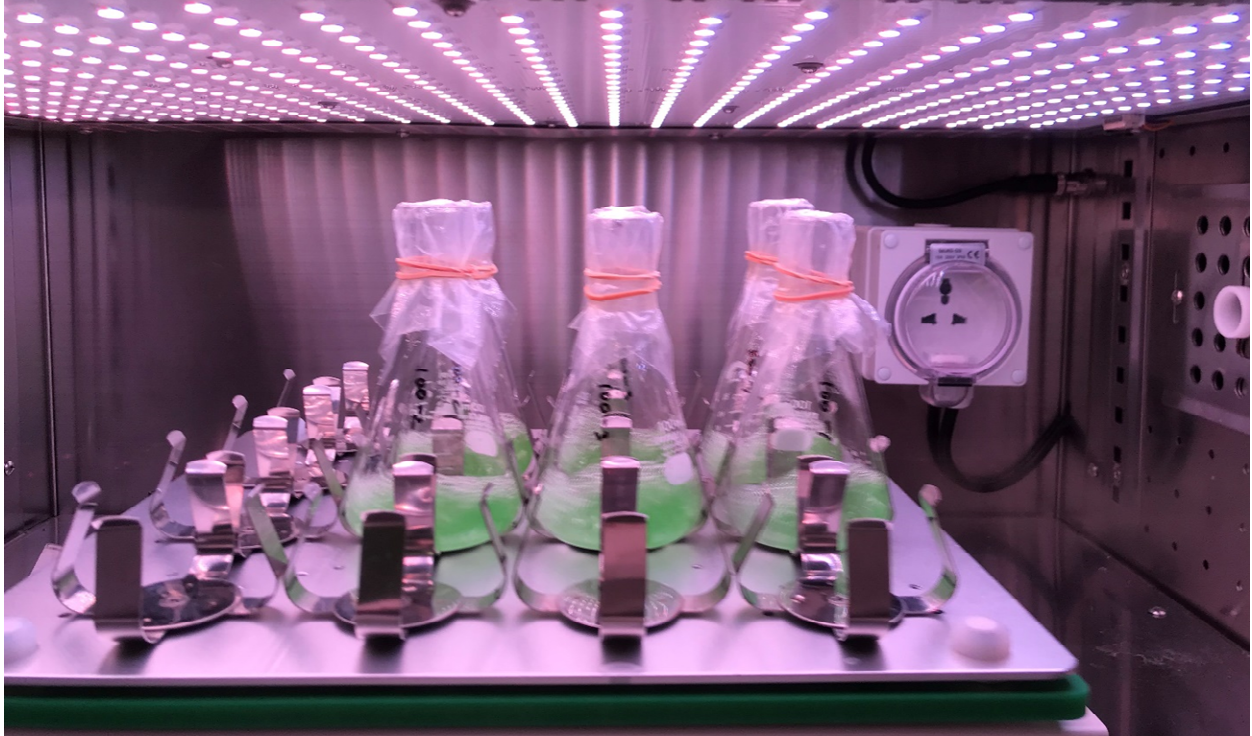

**Supplementary Figure 15.** Cyanobacterial growth facility setup.

## Supplementary Tables

**Supplementary Table 1.** Doubling times of *Synechococcus* sp. PCC 11901, *Synechococcus* sp. PCC 7002 and *Synechococcus elongatus* UTEX 2973. Strains were grown side by side under different conditions. For all lighting conditions RGB ratio was set to 4:2:1 except for 660\*, where the red and blue light were used only at 1:1 ratio. All doubling times are given in hours. Average doubling time was calculated as mean of n=3 biological replicates  $\pm$  standard deviation.

|                                                                                    |  | Doubling times in different conditions (h) |                       |                       |                       |                       |                       |                       |                       |                       |                       |                       |                       |
|------------------------------------------------------------------------------------|--|--------------------------------------------|-----------------------|-----------------------|-----------------------|-----------------------|-----------------------|-----------------------|-----------------------|-----------------------|-----------------------|-----------------------|-----------------------|
|                                                                                    |  | 0.04% CO <sub>2</sub>                      |                       | 1% CO <sub>2</sub>    |                       |                       |                       |                       |                       |                       |                       |                       |                       |
| Temp. (°C)                                                                         |  | 38                                         |                       | 30                    | 34                    |                       | 38                    |                       |                       | 41                    |                       | 43                    |                       |
| Light intensity<br>( $\mu\text{mol photons}\cdot\text{m}^{-2}\cdot\text{s}^{-1}$ ) |  | 100                                        | 300                   | 300                   | 300                   | 500                   | 300                   | 500                   | 660*                  | 300                   | 500                   | 100                   | 300                   |
| <b>PCC 11901</b>                                                                   |  | 3.35<br>$\pm$<br>0.12                      | 3.85<br>$\pm$<br>0.12 | 3.53<br>$\pm$<br>0.03 | 2.92<br>$\pm$<br>0.07 | 3.02<br>$\pm$<br>0.04 | 2.46<br>$\pm$<br>0.02 | 2.33<br>$\pm$<br>0.02 | 2.14<br>$\pm$<br>0.06 | 2.62<br>$\pm$<br>0.07 | 2.80<br>$\pm$<br>0.08 | 3.32<br>$\pm$<br>0.16 | 2.69<br>$\pm$<br>0.06 |
| <b>PCC 7002</b>                                                                    |  | 3.59<br>$\pm$<br>0.12                      | 3.96<br>$\pm$<br>0.22 | 3.19<br>$\pm$<br>0.01 | n/a                   | n/a                   | 2.46<br>$\pm$<br>0.09 | 2.27<br>$\pm$<br>0.01 | 2.29<br>$\pm$<br>0.13 | 2.55<br>$\pm$<br>0.13 | 2.83<br>$\pm$<br>0.16 | n/a                   | n/a                   |
| <b>UTEX 2973</b>                                                                   |  | 3.65<br>$\pm$<br>0.32                      | 3.05<br>$\pm$<br>0.05 | 3.33<br>$\pm$<br>0.02 | n/a                   | n/a                   | 2.08<br>$\pm$<br>0.06 | 2.02<br>$\pm$<br>0.01 | 2.02<br>$\pm$<br>0.04 | 2.15<br>$\pm$<br>0.05 | 1.93<br>$\pm$<br>0.04 | n/a                   | n/a                   |



**Supplementary Table 2.** List of predicted proteins present in genome major insertions of *Synechococcus* sp. PCC 11901 found by BLAST search analysis.

| Locus tag   | Protein name (highest identity)                                                          |
|-------------|------------------------------------------------------------------------------------------|
| FEK30_11785 | ABC transporter permease [Synechococcus sp. NKBG042902]                                  |
| FEK30_11790 | ABC transporter ATP-binding protein [Synechococcus sp. NKBG042902]                       |
| FEK30_11795 | acyltransferase [Synechococcus sp. NKBG042902]                                           |
| FEK30_11800 | FkbM family methyltransferase [Synechococcus sp. NKBG042902]                             |
| FEK30_11805 | glycosyltransferase family 4 protein [Synechococcus sp. NKBG042902]                      |
| FEK30_11810 | glycosyltransferase [Synechococcus sp. NKBG042902]                                       |
| FEK30_11815 | glycosyltransferase family 2 protein [Nodularia sp. NIES-3585]                           |
| FEK30_11820 | glycosyltransferase [Nostoc sp. NIES-3756]                                               |
| FEK30_11825 | hypothetical protein [Nodularia sp. NIES-3585]                                           |
| FEK30_11830 | glycosyltransferase [Nodularia sp. NIES-3585]                                            |
| FEK30_11835 | glycosyltransferase family 2 protein [filamentous cyanobacterium CCP2]                   |
| FEK30_11840 | glycosyltransferase [Nostoc sp. PCC 7524]                                                |
| FEK30_11845 | glycosyltransferase family 2 protein [Synechococcus sp. NKBG042902]                      |
| FEK30_11850 | acyltransferase [Synechococcus sp. NKBG042902]                                           |
| FEK30_11855 | glycosyltransferase family 2 protein [Nostoc sp. NIES-3756]                              |
| FEK30_11860 | glycosyltransferase family 4 protein [Synechococcus sp. NKBG042902]                      |
| FEK30_11865 | glycosyltransferase family 2 protein [Synechococcus sp. NKBG042902]                      |
| FEK30_11870 | glycosyltransferase family 4 protein [Synechococcus sp. NKBG042902]                      |
| FEK30_11875 | glycosyltransferase family 4 protein [Synechococcus sp. NKBG042902]                      |
| FEK30_11880 | hypothetical protein [Synechococcus sp. NKBG042902]                                      |
| FEK30_11885 | glycosyltransferase [Synechococcus sp. NKBG042902]                                       |
| FEK30_12515 | IS5 family transposase [Synechococcus sp. NKBG042902]                                    |
| FEK30_12765 | DGQHR domain-containing protein [Nostocales cyanobacterium]                              |
| FEK30_13300 | DUF3854 domain-containing protein [Synechococcus sp. NKBG042902]                         |
| FEK30_13890 | phospholipid carrier-dependent glycosyltransferase [Synechococcus sp. PCC 7003]          |
| FEK30_15055 | hypothetical protein [Trichormus sp. NMC-1]                                              |
| FEK30_15475 | IS256 family transposase [Synechococcus sp. NKBG042902]                                  |
| FEK30_15980 | FOF1 ATP synthase subunit beta [Synechococcus sp. NKBG042902]                            |
| FEK30_15515 | IS5 family transposase [Synechococcus sp. NKBG042902]                                    |
| FEK30_15850 | IS5 family transposase [Synechococcus sp. NKBG042902]                                    |
| FEK30_01650 | NAD(P)-dependent alcohol dehydrogenase [Synechococcus sp. NKBG042902]                    |
| FEK30_01865 | DNA cytosine methyltransferase [Coleofasciculus chthonoplastes]                          |
| FEK30_01875 | helix-turn-helix transcriptional regulator [Chroococcidiopsis sp. CCALA 051]             |
| FEK30_03655 | BrnT family toxin [Anabaenopsis circularis]                                              |
| FEK30_06150 | TPA: methicillin resistance protein [Syntrophomonas sp.]                                 |
| FEK30_06155 | MULTISPECIES: methionyl-tRNA formyltransferase [Vibrio]                                  |
| FEK30_06165 | translocase [Anaerolineaceae bacterium 4572_78]                                          |
| FEK30_09280 | type II toxin-antitoxin system RelB/DinJ family antitoxin [Synechococcus sp. BDU 130192] |

|             |                                                                                     |
|-------------|-------------------------------------------------------------------------------------|
| FEK30_09285 | type II toxin-antitoxin system YafQ family toxin                                    |
| FEK30_09390 | MULTISPECIES: Fic family protein [Synechococcus]                                    |
| FEK30_09715 | IS5 family transposase [Synechococcus sp. NKBG042902]                               |
| FEK30_09720 | MULTISPECIES: IS982 family transposase [unclassified Cyanobacteria (miscellaneous)] |
| FEK30_10375 | IS630 family transposase [Cyanothece sp. PCC 7425]                                  |
| FEK30_10580 | MULTISPECIES: IS982 family transposase [unclassified Cyanobacteria (miscellaneous)] |
| FEK30_11580 | MULTISPECIES: S-layer homology domain-containing protein [Synechococcus]            |

**Supplementary Table 3.** Media formulations used for the growth experiments<sup>#</sup>. All concentrations are in **mM**. Media in which marine (MAD) and freshwater (5xBG) cyanobacterial strains performed best were marked with star (\*). (Note: The protocol for medium preparation is available on the last page of this supplementary material)

|                                                         | AD7     | BG-11   | MAD*    | MAD2    | MBG     | MBG-Mg+ | 5xBG*   | 5xBGM   |
|---------------------------------------------------------|---------|---------|---------|---------|---------|---------|---------|---------|
| <b>NaNO<sub>3</sub></b>                                 | 12      | 17.6    | 96      | 192     | 96      | 96      | 88      | 96      |
| <b>KH<sub>2</sub>PO<sub>4</sub></b>                     | 0.37    | -       | 1.2     | 2.4     | -       | -       | -       | 0.6     |
| <b>K<sub>2</sub>HPO<sub>4</sub></b>                     | -       | 0.175   | -       | -       | 1.2     | 1.2     | 0.875   | 0.6     |
| <b>NaCl</b>                                             | 308     | -       | 308     | 308     | -       | -       | -       | -       |
| <b>KCl</b>                                              | 8       | -       | 8       | 8       | -       | -       | -       | -       |
| <b>CaCl<sub>2</sub> · 2H<sub>2</sub>O</b>               | 2.5     | 0.245   | 2.5     | 2.5     | 0.245   | 0.245   | 1.22    | 1.22    |
| <b>Na<sub>2</sub>EDTA</b>                               | 0.081   | 0.027   | 0.081   | 0.081   | 0.027   | 0.027   | 0.13    | 0.13    |
| <b>MgSO<sub>4</sub> · 7H<sub>2</sub>O</b>               | 20.3    | 0.3     | 20.3    | 20.3    | 0.3     | 20.3    | 1.52    | 1.52    |
| <b>FeCl<sub>3</sub> · 6H<sub>2</sub>O</b>               | 0.015   | -       | 0.24    | 0.48    | -       | -       | -       | -       |
| <b>Ammonium iron (III) citrate</b>                      | -       | 0.023   | -       | -       | 0.24    | 0.24    | 0.24    | 0.24    |
| <b>Tris-HCl</b>                                         | 8.6     | -       | 8.6     | 8.6     | -       | -       | -       | -       |
| <b>H<sub>3</sub>BO<sub>3</sub></b>                      | 0.046   | 0.046   | 0.046   | 0.138   | 0.046   | 0.046   | 0.231   | 0.231   |
| <b>MnCl<sub>2</sub> · 4H<sub>2</sub>O</b>               | 0.0091  | 0.0091  | 0.0091  | 0.0273  | 0.0091  | 0.0091  | 0.0457  | 0.0457  |
| <b>ZnSO<sub>4</sub> · 7H<sub>2</sub>O</b>               | 0.00077 | 0.00077 | 0.00077 | 0.00213 | 0.00077 | 0.00077 | 0.00386 | 0.00386 |
| <b>Na<sub>2</sub>MoO<sub>4</sub> · 2H<sub>2</sub>O</b>  | 0.00521 | 0.00161 | 0.00521 | 0.01563 | 0.00161 | 0.00161 | 0.00806 | 0.00806 |
| <b>CuSO<sub>4</sub> · 5H<sub>2</sub>O</b>               | 0.00032 | 0.00032 | 0.00032 | 0.00096 | 0.00032 | 0.00032 | 0.00158 | 0.00158 |
| <b>(CoNO<sub>3</sub>)<sub>2</sub> · 6H<sub>2</sub>O</b> | -       | 0.00017 | -       | -       | 0.00017 | 0.00017 | 0.00084 | 0.00084 |
| <b>CoCl<sub>2</sub> · 6H<sub>2</sub>O</b>               | 0.00017 | -       | 0.00017 | 0.00051 | -       | -       | -       | -       |
| <b>vitamin B<sub>12</sub></b>                           | 0.003   | -       | 0.003   | 0.009   | -       | -       | -       | -       |
| <b>Na<sub>2</sub>CO<sub>3</sub></b>                     | -       | 0.189   | -       | -       | 0.189   | 0.189   | 0.472   | 0.943   |
| <b>citric acid</b>                                      | -       | 0.031   | -       | -       | 0.031   | 0.031   | 0.156   | 0.156   |

<sup>#</sup>During MAD and MAD2 medium preparation excessive phosphate was added as the last component. At this stage medium can be either filtered using 0.22 µm sterile filters (no precipitate forming) or autoclaved (precipitate of phosphate salts will form). 5xBG and 5xBGM media were sterile-filtered.

<sup>##</sup>2000x concentrated and filter sterile FeCl<sub>3</sub> stocks were prepared in 0.1 M HCl and added to the medium only upon medium filtering or autoclaving to avoid formation of poorly soluble iron hydroxides.

**Supplementary Table 4.** List of vectors and primers used for the amplification of DNA blocks for the Gibson assembly. (\*) – plasmids obtained from other labs (as specified in the Methods section).

| Plasmid name                          | PCR template                        | PCR product                | Primer name                                | Primer sequence (5'-3')                                                                                                                           |
|---------------------------------------|-------------------------------------|----------------------------|--------------------------------------------|---------------------------------------------------------------------------------------------------------------------------------------------------|
| pSW036<br>(Addgene ID: 140034)        | Synechococcus sp. PCC 11901 gDNA    | acsA upstream FR           | SSW07_acsA_up_F<br>SSW07_acsA_up_R         | GACGTTGTAAAACGACGGCCAGTgcaatgctgaga<br>tgatcctcggtgaa<br>ttattatcgtgggatttattcccccatt                                                             |
|                                       | pAcsA_cpt_YFP*                      | Pcpt-YFP                   | cpt-YFP_acsA_F<br>cpt-YFP_acsA_R           | aatgggggtaaataaatcccacgataataatacaaaaaag<br>caggaataaaattaacaagatgtaac<br>aagacacctctgtcctctggacatcttgaggccgtgatcta<br>gacaaa                     |
|                                       | Synechococcus sp. PCC 11901 gDNA    | acsA downstream FR         | SSW07_acsA_dw_F<br>SSW07_acsA_dw_R         | agatgtccagaggacagagggtgt<br>CAATTTACACAGGAAACAGCTATGACagtaaattc<br>agagacagaaacctccagacg                                                          |
|                                       | pUC19                               | pUC backbone               | pUC19_B_F<br>pUC19_B_R                     | GTCATAGCTGTTTCCTGTGTGAAATTGTTATC<br>ACTGGCCGTCGTTTTACAACGT                                                                                        |
| pSW039<br>(Addgene ID: 140035)        | Synechococcus sp. PCC 11901 gDNA    | psbA2 upstream FR          | SSW07_psbA2_up_F<br>SSW07_psbA2_up_R       | CAGTCACGACGTTGTAAAACGACGGCCAGTaatt<br>agtgtaggagatcaccgttgaattgatcac<br>aattgcatgtaccagtttaaagtactgggg                                            |
|                                       | pAcsA_cLac143_YFP*                  | Pclac143-YFP               | clac143-YFP_psbA2_F<br>clac143-YFP_psbA2_R | ccccagtactttaactgggtacatgcaattgactcccctctgga<br>catctcca<br>aaccacagcacaattcccttaaaaagcaacattaattgcgtt<br>gcgctcactg                              |
|                                       | Synechococcus sp. PCC 11901 gDNA    | psbA2 downstream FR        | SpR_psbA2_F<br>SpR_psbA2_R                 | tgcttttaagggaaattgtgcgtgtggtt<br>ccactgcaatcccaaattcaaaactccagAAACGGATGA<br>AGGCACGAACCCAG                                                        |
|                                       | pDF-trc*                            | Spec <sup>R</sup>          | SSW07_psbA2_dw_F<br>SSW07_psbA2_dw_R       | ctggaagttgaattgggattgcagtg<br>TTTCACACAGGAAACAGCTATGACTggcaggcgag<br>acaactgcttctg                                                                |
|                                       | pUC19                               | pUC backbone               | pUC19_B_F<br>pUC19_B_R                     | GTCATAGCTGTTTCCTGTGTGAAATTGTTATC<br>ACTGGCCGTCGTTTTACAACGT                                                                                        |
| pSZ013<br>(used for subcloning only)  | codon optimized tesA from GenScript | tesA                       | ICA_tesA_to_cLac_F<br>ICA_tesA_to_cLac_R   | gataacaattcacacaccaactcataaagtcaagtaggaga<br>ttaattccATGGATACCTCCTCATTCTC<br>gtggcagcagccaactcagcttcttgggcttgttagacag<br>ccggatAGGGCCGAGTTTGACAAG |
|                                       | pAcsA_cLac143_YFP                   | pAcsA_cLac143_YFP backbone | pAcsA_bef_pMB2_F<br>pAcsA_lacO_R           | ATCCGGCTGTCTAACAAAG<br>GGAATTAATCTCCTACTTGACTTTATG                                                                                                |
| pUC19-fadD (used for subcloning only) | codon optimized tesA from GenScript | tesA                       | InF_fadD_F<br>InF_fadD_R                   | ACCCGGGGATCCTCTCAGGTCAATGACATTGC<br>CTGCAGGTCGACTCTACCAGATTATCGCCCACTT<br>TC                                                                      |
|                                       | pUC19                               | puc19 backbone             | XbaI digested                              |                                                                                                                                                   |
| pSZT025<br>(Addgene ID: 140033)       | pUC57-kan                           | Kan <sup>R</sup>           | ICA_KanR_F<br>ICA_KanR_R                   | gggatctcgaccgatcccttgagaATTAAGGAGTGGA<br>CAacattgc<br>TCCGCCATTCCGGATCGCTTAATCTACGTGAACCA<br>AGTCATTAGAAAAAC                                      |
|                                       | pUC19                               | puc19                      | ICA_open_fadD_F                            | gtttttctaaTGACTTGGTTCACGTAGATTAAGCGA                                                                                                              |

|                                            |                                     |                      |                                        |                                                                                                                                                                                                                     |
|--------------------------------------------|-------------------------------------|----------------------|----------------------------------------|---------------------------------------------------------------------------------------------------------------------------------------------------------------------------------------------------------------------|
|                                            |                                     | backbone             | ICA_open_fadD_R                        | TCCGAATGG<br>CACAATTCGtttgagatgtccagaAATTCCATTTAAA<br>AGCGCAAAAAAC                                                                                                                                                  |
| pSW040<br>(used for<br>subcloning<br>only) | Synechococcus sp. PCC<br>11901 gDNA | fadD FR              | SSW fadD up F2<br><br>SSW07 fadD dw R2 | GTAACGCCAGGGTTTTCCAGTCACGACGTTGT<br>AAAACGACGGCCAGTtaattaaattgactcgcgatcgc<br>ctgcaatggcctgggcctggcgacaat<br>ATGTTGTGTGGAATTGTGAGCGGATAACAATTT<br>CACACAGGAAACAGCTATGACaatcgccgtggatt<br>gaggtgggaataagggttgagccgtg |
|                                            | pUC19                               | pUC backbone         | pUC19_B_F<br>pUC19_B_R                 | GTCATAGCTGTTTCCTGTGTGAAATTGTTATC<br>ACTGGCCGTCGTTTTACAACGT                                                                                                                                                          |
| pSW068<br>(Addgene<br>ID: 140036)          | pSZ025                              | clac143-tesA         | clac143-fadD F<br><br>clac143-fadD R   | cttttaatggaattgcctctggacatctccaaaCGAATTGT<br>GA<br>gatatattttatctgtgcaatgtTAATCTagAAAGATGA<br>CTAATTCGCTCGTC                                                                                                        |
|                                            | pSW040                              | pUC-fadD<br>backbone | pUC19_B_F<br>pUC19_B_R                 | GTCATAGCTGTTTCCTGTGTGAAATTGTTATC<br>ACTGGCCGTCGTTTTACAACGT                                                                                                                                                          |
| pSW071<br>(Addgene<br>ID: 140037)          | pSW068                              | pSW068 w/o<br>tesA   | SSW fadD KO F<br><br>SSW fadD KO R     | tggaattgccacattgcacaagataaaaatatcatcatgaa<br>caataaaact<br>caatgtggcaattccattaaaagcgcaaaaaacaag                                                                                                                     |
| pSW072                                     | pSZ025                              | pSZ025 w/o<br>tesA   | SSW fadD KO F<br><br>SSW fadD KO R     | tggaattgccacattgcacaagataaaaatatcatcatgaa<br>caataaaact<br>caatgtggcaattccattaaaagcgcaaaaaacaag                                                                                                                     |

**Supplementary Table 5.** List of primers used for sequencing of constructs and genotyping of transformed cyanobacterial strains.

| Primer name       | Primer sequence (5'-3')      | Binding region                    |
|-------------------|------------------------------|-----------------------------------|
| CYA361f           | GGAATTTTCCGCAATGGG           | Cyanobacterial 16S rRNA           |
| CYA785r           | GACTACWGGGGTATCTAATCC        | Cyanobacterial 16S rRNA           |
| 27f               | AGAGTTTGATCCTGGCTCAG         | Bacterial 16S rRNA                |
| 1492r             | TACCTTGTTACGACTT             | Bacterial 16S rRNA                |
| SSW_seg_acsA_F    | aggtcatatccgaggcgtacattca    | PCC 11901 <i>acsA</i> upstream    |
| SSW_seg_acsA_R    | gaactaggtcaaggcaagcagtcgg    | PCC 11901 <i>acsA</i> downstream  |
| SSW07 psbA2 seg F | gtgattaagcaataaatcgattgagcga | PCC 11901 <i>psbA2</i> upstream   |
| SSW07 psbA2 seg R | tcaggattcagagcaaaccaagatta   | PCC 11901 <i>psbA2</i> downstream |
| fadD SSW07 seg F  | agtaggattgtagccatgatttcgg    | PCC 11901 <i>fadD</i> upstream    |
| fadD SSW07 seg R  | taggcacttggtttccgtccat       | PCC 11901 <i>fadD</i> downstream  |



## Supplementary Notes

### 16S rRNA sequence of the isolated bacterial contaminant:

GGCAGTACCATGCAGTCGAGCGCACCTTCGGGTGAGCGGCGGACGGGTTAGTAACGCGTGGGAACGTACCCTT  
TTCTAAGGAATAGCCACTGGAAACGGTGAGTAATACCTTATACGCCCTTCGGGGGAAAGATTTATCGGAGAAGGA  
TCGGCCCGCGTTAGATTAGATAGTTGGTGGGGTAACGGCCTACCAAGTCTACGATCTATAGCTGGTTTTAGAGGAT  
GATCAGCAACTGGGACTGAGACACGGCCCCAGACTCCTACGGGAGGCAGCAGTGGGGAATCTTGACAATGGG  
CGCAAGCCTGATCCAGCCATGCCGCGTGAGTGATGAAGGCCTTAGGGTCGTAAAGCTCTTTCGCTGGGGATGATA  
ATGACAGTACCCAGTAAAGAAACCCCGGCTAACTCCGTGCCAGCAGCCGCGGTAATACGGAGGGGGTTAGCGTT  
GTTTCGGAATTACTGGGCGTAAAGCGCGCTAGGCGGATTGGAAAGTTGGGGGTGAAATCCCGGGGCTCAACCTC  
GGAAGTGCCTCCAAAATATCAGTCTAGAGTTCGAGAGAGGTGAGTGGAATCCGAGTGTAGAGGTGAAATTCGT  
AGATATTCGGAGGAACACCAAGTGGCGAAGGCGGCTCACTGGCTCGATACTGACGCTGAGGTGCGAAAGTGTGGG  
GAGCAAACAGGATTAGATACCCTGGTAGTCCACACCGTAAACGATGAATGCCAGTCGTGAGCAAGCATGCTTGTT  
GGTGACACACCTAACGGATTAAGCATTCCGCCTGGGGAGTACGGTCGCAAGATTA AAACTCAAAGGAATTGACGG  
GGGCCCGCACAAGCGGTGGAGCATGTGGTTTAATTCGAAGCAACGCGCAGAACCTTACCAACCTTGACATCCTG  
TGCTACATCCAGAGATGGATGGTTCCCTTCGGGGACGCAGTGACAGGTGCTGCATGGCTGTCGTGAGCTCGTGTC  
GTGAGATGTTTCGGTTAAGTCCGGCAACGAGCGCAACCCACATCTTCAGTTGCCAGCAGTTCGGCTGGGCACTCTG  
GAGAACTGCCGTGATAAGCGGGAGGAAGGTGTGGATGACGTCAAGTCTCATGGCCCTTACGGGTTGGGCTA  
CACACGTGCTACAATGGCAGTGACAATGGGTTAATCCCCAAAACGTCTCAGTTCGGATTGTTCTCTGCAACTCG  
AGAGCATGAAGTCGGAATCGCTAGTAATCGCGTAACAGCATGACGCGGTGAATACGTTCCCGGGCCTTGACACA  
CCGCCCGTACACCATGGGAGTTGGGTTTACCCGAAGACGGTGCGCCAACCTTAGGAGGCAGCTGCCACGTANT  
ANNNNNNNNCCGGCTAACTCCGTGCCAGCAGCCGCGGTAATACGGAGGGGTTAGCGTTGTTTCGGAATTACTG  
GGCGTAAAGCGCGCTAGGCGGATTGGAAAGTTGGGGGTGAAATCCCGGGGCTCAACCTCGGAACTGCCTCCAA  
AACTATCAGTCTAGAGTTCGAGAGAGGTGAGTGGAATCCGAGTGTAGAGGTGAAATTCGTAGATATTCGGAGG  
AACACCAGTGGCGAAGGCGGCTCACTGGCTCGATACTGACGCTGAGGTGCGAAAGTGTGGGGAGCAAACAGGAT  
TAGATACCCTGGTAGTCCACACCGTAAACGATGAATGCCAGTCGTGAGCAAGCATGCTTGTTGGTGACACACCTAA  
CGGATTAAGCATTCCGCCTGGGGAGTACGGTCGCAAGATTA AAACTCAAAGGAATTGACGGGGGGCCCGCACAAG  
CGGTGGAGCATGTGGTTTAATTCGAAGCAACGCGCAGAACCTTACCAACCTTGACATCCTGTGCTACATCCAGAG  
ATGGATGGTTCCCTTCGGGGACGCAGTGACAGGTGCTGCATGGCTGTCGTGAGCTCGTGCTGAGATGTTTCGGT  
TAAGTCCGGCAACGAACGCAACCCACATCTTCAGTTGCCAGCAGTTCGGCTGGGCACTCTGGAGAACTGCCCGT  
GATAAACCGGAAGGAAGGTGTTGAATGACGTCAAGTCTCCAGGGCCCTTACCGGGTTGGGGTTACCACCGTGGC  
TACAATGGCCAGTGACAATGGGGTTAATCCCCAAAACGTTCACAGTTCGAATTGTTTCCTTGAACCTCGGAG  
AGCTTGAAATCCGGAA

## Supplementary Methods

### AD7 medium (1 L) preparation protocol:

---

|                                      |        |
|--------------------------------------|--------|
| NaCl                                 | 18 g   |
| MgSO <sub>4</sub> ·7H <sub>2</sub> O | 5 g    |
| A <sup>+</sup> modified 100x         | 10 mL  |
| Tris (125 g/L), pH=8.2               | 8.3 mL |
| Modified D7 1000x                    | 1 mL   |

Autoclave (or sterilize using 0.22 µm filter) and cool down to room temperature to add:

|                                              |        |
|----------------------------------------------|--------|
| FeCl <sub>3</sub> ·6H <sub>2</sub> O (30 mM) | 0.5 mL |
| Vitamin B <sub>12</sub>                      | 1 mL   |

---

For plates, add 12 g/L bacto-agar and 2 g/L of sodium thiosulfate.

### Stock solutions:

---

#### Modified D7 metal 1000x

|                                                     |            |
|-----------------------------------------------------|------------|
|                                                     | <b>1 L</b> |
| H <sub>3</sub> BO <sub>3</sub>                      | 2.86 g     |
| MnCl <sub>2</sub> ·4H <sub>2</sub> O                | 1.81 g     |
| ZnSO <sub>4</sub> ·7H <sub>2</sub> O                | 222 mg     |
| Na <sub>2</sub> MoO <sub>4</sub> ·2H <sub>2</sub> O | 1.26 g     |
| CuSO <sub>4</sub> ·5H <sub>2</sub> O                | 79 mg      |
| CoCl <sub>2</sub> ·6H <sub>2</sub> O                | 40.3 mg    |

---

#### A<sup>+</sup> modified 100x

|                                      |            |
|--------------------------------------|------------|
|                                      | <b>1 L</b> |
| KCl                                  | 60 g       |
| NaNO <sub>3</sub>                    | 100 g      |
| CaCl <sub>2</sub> ·2H <sub>2</sub> O | 37 g       |
| Na <sub>2</sub> EDTA                 | 3 g        |
| KH <sub>2</sub> PO <sub>4</sub>      | 5 g        |

---

#### Tris (125 g/L) pH 8.2 (100x stock)

**FeCl<sub>3</sub>· 6H<sub>2</sub>O:** 30 mM stock in 0.1 M HCl – filter sterile  
0.811 g of FeCl<sub>3</sub>· 6H<sub>2</sub>O resuspended in 0.1 M HCl to 100 mL

**KH<sub>2</sub>PO<sub>4</sub>:** 1 M stock (13.6 g/100 mL MilliQ H<sub>2</sub>O) – filter sterile

**Vitamin B12:** 4 mg/L stock – filter sterile

**MAD medium (1 L) preparation protocol (resuspend all ingredients in MilliQ water in the following order):**

---

|                                         |         |
|-----------------------------------------|---------|
| NaCl                                    | 18 g    |
| MgSO <sub>4</sub> ·7H <sub>2</sub> O    | 5 g     |
| A <sup>+</sup> modified 100x            | 10 mL   |
| Tris (125 g/L), pH=8.2                  | 8.3 mL  |
| Modified D7 1000x                       | 1 mL    |
| + NaNO <sub>3</sub>                     | 7 g     |
| + KH <sub>2</sub> PO <sub>4</sub> (1 M) | 0.83 mL |

Autoclave (or sterilize using 0.22 µm filter) and cool down to room temperature to add:

|                                               |        |
|-----------------------------------------------|--------|
| FeCl <sub>3</sub> ·6H <sub>2</sub> O (480 mM) | 0.5 mL |
| Vitamin B <sub>12</sub>                       | 1 mL   |

---

**Stock solutions:**

---

**Modified D7 metal 1000x**

|                                                     |            |
|-----------------------------------------------------|------------|
|                                                     | <b>1 L</b> |
| H <sub>3</sub> BO <sub>3</sub>                      | 2.86 g     |
| MnCl <sub>2</sub> ·4H <sub>2</sub> O                | 1.81 g     |
| ZnSO <sub>4</sub> ·7H <sub>2</sub> O                | 222 mg     |
| Na <sub>2</sub> MoO <sub>4</sub> ·2H <sub>2</sub> O | 1.26 g     |
| CuSO <sub>4</sub> ·5H <sub>2</sub> O                | 79 mg      |
| CoCl <sub>2</sub> ·6H <sub>2</sub> O                | 40.3 mg    |

---

**A+ modified 100x**

|                                      |            |
|--------------------------------------|------------|
|                                      | <b>1 L</b> |
| KCl                                  | 60 g       |
| NaNO <sub>3</sub>                    | 100 g      |
| CaCl <sub>2</sub> ·2H <sub>2</sub> O | 37 g       |
| Na <sub>2</sub> EDTA                 | 3 g        |
| KH <sub>2</sub> PO <sub>4</sub>      | 5 g        |

---

**Tris (125 g/L) pH 8.2 (100x stock)**

**FeCl<sub>3</sub>· 6H<sub>2</sub>O:** 480 mM stock in 0.1 M HCl – filter sterile  
12.97 g of FeCl<sub>3</sub>· 6H<sub>2</sub>O resuspended in 0.1 M HCl to 100 mL

**KH<sub>2</sub>PO<sub>4</sub>:** 1 M stock (13.6 g/100 mL MilliQ H<sub>2</sub>O) – filter sterile

**Vitamin B12:** 4 mg/L stock – filter sterile

**MAD2 medium (1 L) preparation protocol (resuspend all ingredients in MilliQ water in the following order):**

---

|                                         |         |
|-----------------------------------------|---------|
| NaCl                                    | 18 g    |
| MgSO <sub>4</sub> ·7H <sub>2</sub> O    | 5 g     |
| A <sup>+</sup> modified 100x            | 10 mL   |
| Tris (125 g/L), pH=8.2                  | 8.3 mL  |
| Modified D7 1000x                       | 1 mL    |
| + NaNO <sub>3</sub>                     | 15 g    |
| + KH <sub>2</sub> PO <sub>4</sub> (1 M) | 2.03 mL |

Autoclave (or sterilize using 0.22 µm filter) and cool down to room temperature to add:

|                                               |      |
|-----------------------------------------------|------|
| FeCl <sub>3</sub> ·6H <sub>2</sub> O (480 mM) | 1 mL |
| Vitamin B <sub>12</sub>                       | 3 mL |

---

**Stock solutions:**

---

**Modified D7 metal 1000x**

|                                                     |            |
|-----------------------------------------------------|------------|
|                                                     | <b>1 L</b> |
| H <sub>3</sub> BO <sub>3</sub>                      | 2.86 g     |
| MnCl <sub>2</sub> ·4H <sub>2</sub> O                | 1.81 g     |
| ZnSO <sub>4</sub> ·7H <sub>2</sub> O                | 222 mg     |
| Na <sub>2</sub> MoO <sub>4</sub> ·2H <sub>2</sub> O | 1.26 g     |
| CuSO <sub>4</sub> ·5H <sub>2</sub> O                | 79 mg      |
| CoCl <sub>2</sub> ·6H <sub>2</sub> O                | 40.3 mg    |

---

---

**A+ modified 100x**

|                                      |            |
|--------------------------------------|------------|
|                                      | <b>1 L</b> |
| KCl                                  | 60 g       |
| NaNO <sub>3</sub>                    | 100 g      |
| CaCl <sub>2</sub> ·2H <sub>2</sub> O | 37 g       |
| Na <sub>2</sub> EDTA                 | 3 g        |
| KH <sub>2</sub> PO <sub>4</sub>      | 5 g        |

---

**Tris (125 g/L) pH 8.2 (100x stock)**

**FeCl<sub>3</sub>·6H<sub>2</sub>O:** 480 mM stock in 0.1 M HCl – filter sterile  
12.97 g of FeCl<sub>3</sub>·6H<sub>2</sub>O resuspended in 0.1 M HCl to 100 mL

**KH<sub>2</sub>PO<sub>4</sub>:** 1 M stock (13.6 g/100 mL MilliQ H<sub>2</sub>O) – filter sterile

**Vitamin B12:** 4 mg/L stock – filter sterile

**References:**

1. Clark, R. L. *et al.* Light-optimized growth of cyanobacterial cultures: Growth phases and productivity of biomass and secreted molecules in light-limited batch growth. *Metab. Eng.* **47**, 230–242 (2018).
