# Supplementary material
Source: PubMed Central journal article supplement (PMC7206151)
Supplement: 42003_2020_910_MOESM2_ESM.pdf [file 42003_2020_910_MOESM2_ESM.pdf]

## Description of Additional Supplementary Files

**File Name: Supplementary Data 1**

**Description:** Two-tailed t-test analysis and one-way analysis of variation (ANOVA) analysis of the raw datasets.
